# Supplementary material for: Anisotropic magnetite nanoclusters with enhanced magnetization as an efficient ferrofluid in mass transfer and liquid hyperthermia
Source: Royal Society of Chemistry journal article supplement (doi:10.1039/c9nj00212j), 2019-01-01
Supplement: c9nj00212j2.pdf [file c9nj00212j2.pdf]

## Supporting Information

### **Anisotropic magnetite nanoclusters with enhanced magnetization as an efficient ferrofluid in mass transfer and liquid hyperthermia**

**Alireza Mouraki, Zeinab Alinejad, Samira Sanjabi, Ali Reza Mahdavian\***

Polymer Science Department, Iran Polymer & Petrochemical Institute, P.O. Box: 14965/115, Tehran, Iran Tel: +9821 4478 7000, Fax: +9821 4478 7023; Email: [a.mahdavian@ippi.ac.ir](mailto:a.mahdavian@ippi.ac.ir)

#### **1. FT-IR analysis**

Magnetite nanoparticles were prepared and successful formation of Fe<sub>3</sub>O<sub>4</sub> NPs and their modification was proved by FT-IR analysis, as shown in Figure 1S [a) Fe<sub>3</sub>O<sub>4</sub>, b) PAA and c) Fe<sub>3</sub>O<sub>4</sub>@PAA]. These show the changes in functional groups through modification reaction. The characteristic peaks of magnetite NPs are Fe<sup>2+</sup>-O and Fe<sup>3+</sup>-O stretching bands at 580 cm<sup>-1</sup> and 430 cm<sup>-1</sup> (Figure 1S-a and Figure 1S-c), respectively. The peaks around 3420 and 1623 cm<sup>-1</sup> are ascribed to the stretching and bending vibrations of hydroxyl groups on the surface of magnetite NPs, respectively, which confirm the preparation of magnetite nanoparticles. The appearance of C=O stretching vibration peak (1705 cm<sup>-1</sup>), C-O-C stretching vibration peak (1102 cm<sup>-1</sup>), C-H stretching vibration peak (2915 cm<sup>-1</sup>), CH<sub>2</sub> bending vibration peak (796 cm<sup>-1</sup>) and the characteristic absorption peaks of carboxylic groups at 1592 cm<sup>-1</sup> and 1398 cm<sup>-1</sup> in Figure 1S-c confirm successful attachment of PAA on the surface of the Fe<sub>3</sub>O<sub>4</sub> NPs.

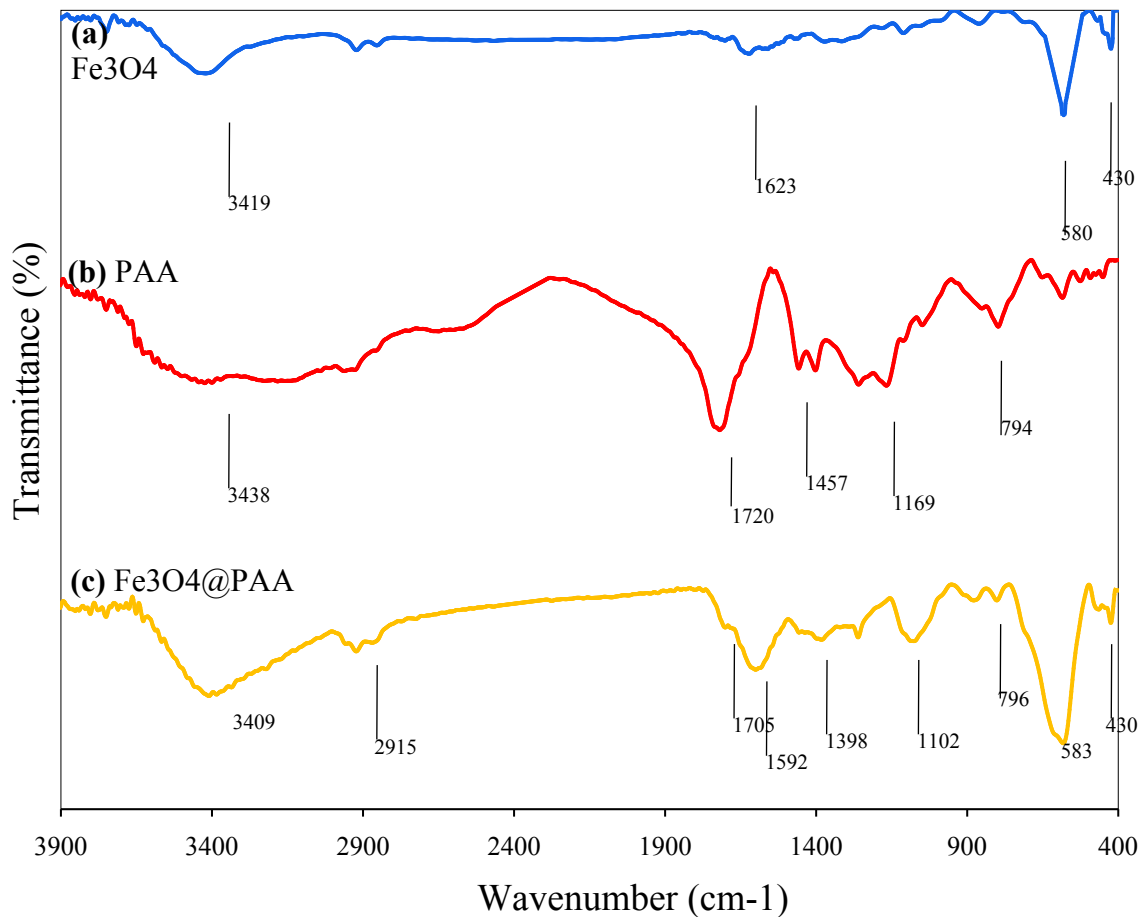

**Figure 1S. FT-IR spectra of: (a) pristine Fe<sub>3</sub>O<sub>4</sub> NPs, (b) prepared PAA, and (c) Fe<sub>3</sub>O<sub>4</sub>@PAA nanoclusters**

## 2. XRD analysis

The crystalline structure of modified Fe<sub>3</sub>O<sub>4</sub> NPs was verified by X-ray diffraction pattern (Figure 2S). All of the diffraction peaks in the XRD pattern of Fe<sub>3</sub>O<sub>4</sub>@PAA match well with the characteristic diffractions of standard Fe<sub>3</sub>O<sub>4</sub> inverse spinel structure (Joint Committee for Powder Diffraction Studies, JCPDS, Card No. 19-0629). There are two extra polymeric phases (polyacrylic acid (PAA) and poly ethylene glycol (PEG 600)) in our sample. Their total amount is about 9 wt%

(based on TGA result) and hence, their crystalline planes would be observable in the XRD spectra. The broad peaks around 22 and 45-50° could be attributed to both PAA and PEG on the surface of Fe<sub>3</sub>O<sub>4</sub> NPs. Also, the signal around 55° is related to PEG 600. PEG represents more semi crystalline nature in comparison to PAA.

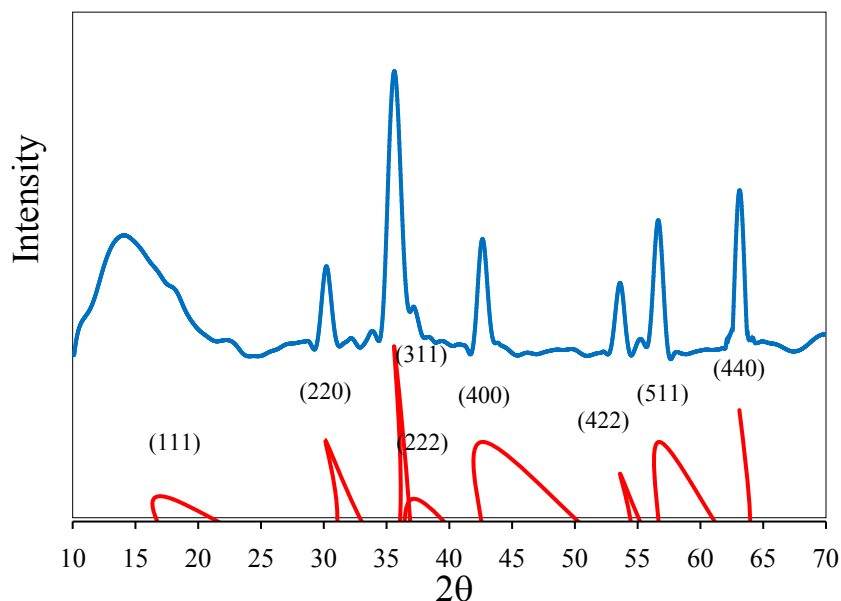

**Figure 2S. X-ray diffraction pattern of Fe<sub>3</sub>O<sub>4</sub>@PAA nanoclusters**

### 3. TGA analysis

Adsorption of PAA on the surface of magnetite was studied by thermogravimetric analysis (TGA). TGA was used to investigate thermal stability of Fe<sub>3</sub>O<sub>4</sub> NPs and to characterize the approximate extent of modification. TGA analysis was carried out up to 600 °C to ensure the removal of volatile organic compounds. The weight loss in the range of 250–450 °C in Fe<sub>3</sub>O<sub>4</sub> NPs (Figure 3S-a) is related to the degradation of adsorbed stabilizer agents (PEG and NaOAc) to Fe<sub>3</sub>O<sub>4</sub>. The difference between weight residues at 600 °C for Fe<sub>3</sub>O<sub>4</sub>@PAA NPs relative to pristine Fe<sub>3</sub>O<sub>4</sub> NPs was found

9% and illustrates the relative amount of adsorbed PAA (Figure 3S-c). These data display that modification of  $\text{Fe}_3\text{O}_4$  NPs with PAA has been performed successfully.

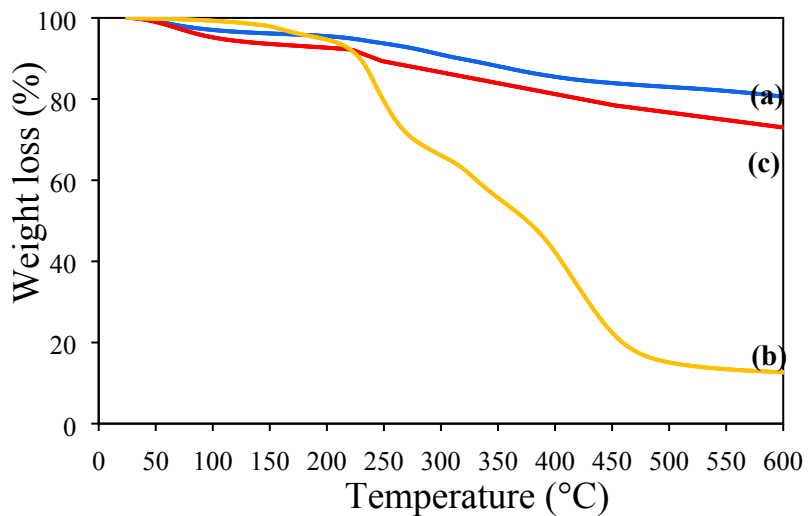

**Figure 3S. TGA thermograms of (a) pristine  $\text{Fe}_3\text{O}_4$  NPs, (b) PAA and (c)  $\text{Fe}_3\text{O}_4@$ PAA nanoclusters**

#### 4. Magnetic tests

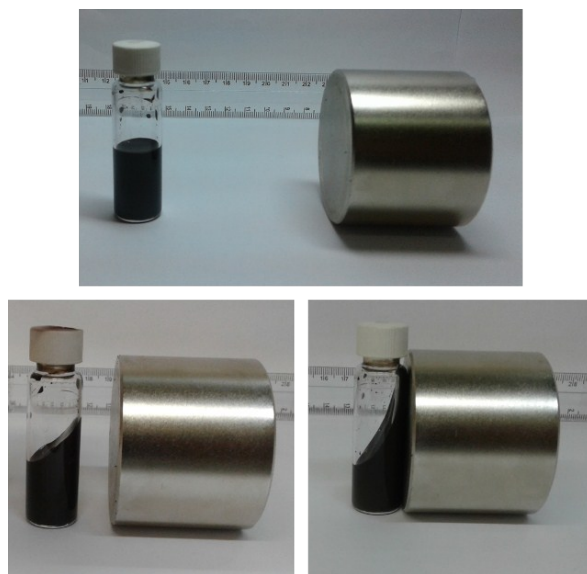

**Figure 4S. Instant magnetic response of the prepared  $\text{Fe}_3\text{O}_4@\text{PAA}$  nanoclusters dispersion in water to an external magnet**

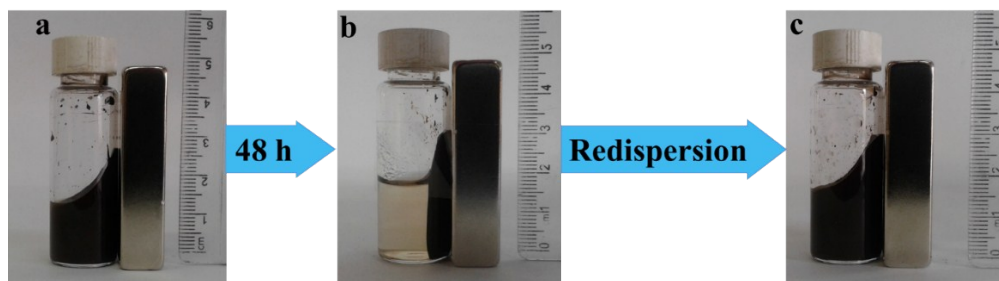

**Figure 5S. Time-dependent pictures of the prepared  $\text{Fe}_3\text{O}_4@\text{PAA}$  nanoclusters dispersion in water and under a 2500 gauss external magnetic field. The pictures were taken (a) at the beginning, (b) after 48 h of applying the magnetic field, and (c) after redispersion.**

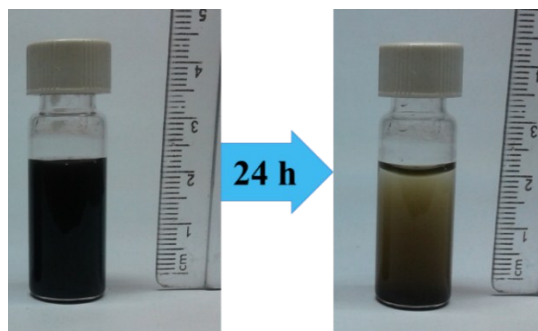

**Figure 6S. The dispersibility of pristine  $\text{Fe}_3\text{O}_4$  NPs in water after 24 h**

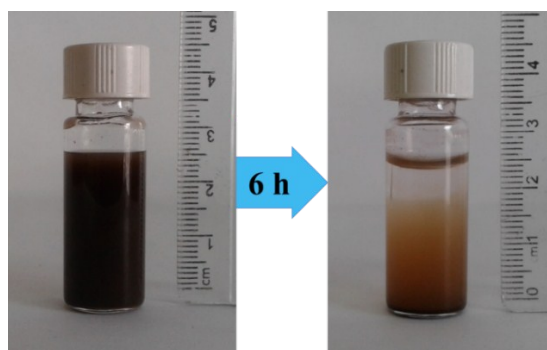

**Figure 7S. Aqueous dispersion of  $\text{Fe}_3\text{O}_4@\text{PAA}$  nanoclusters (1 wt%) at pH 4 primarily and after 6 h**
